# Supplementary material
Source: PubMed Central journal article supplement (PMC3035501)

## SUPPLEMENTAL FIGURES AND TABLES

### **Supplemental figure 1. Low-fat/high-carbohydrate diet consumption induces an increase**

**in palmitate and palmitoleate levels.** Plasma levels of the fatty acid methyl ester (FAME) derivatives of palmitate (16:0), palmitoleate (16:1), stearate (18:0), oleate (18:1), linoleate (18:2),  $\alpha$ -linolenate (18:3), arachidonate (20:4), and docosahexaenoate (22:6) are given in  $\mu\text{mole/ml}$ . Data are means  $\pm$  SE of  $n = 9$  animals per group per time point.  $^{\#}P < 0.05$ ;  $^{\#\#}P < 0.01$ ;  $^{\#\#\#}P < 0.001$  vs. WD at same age.  $^{\$}P < 0.05$ ;  $^{\$\$\$}P < 0.001$  vs. HFD at same age.

### **Supplemental figure 2. Intracardiac expression of endoplasmic reticulum stress markers**

**remains unchanged between the three diets.** Transcript levels of the peptide-binding molecular chaperones Hspa5/BIP (**A**) and Grp94 (**B**), and of the disulfide isomerase Pdia4/Erp72 (**C**) were quantified by real-time PCR in the heart of Wistar rats fed either low-fat/high-carbohydrate (HCD; open bars), high-fat (HFD; hatched bars), or Western diet (WD; black bars) for acute (AT), short (ST), intermediate (IT), or long term (LT). Baseline mRNA levels (**B**; grey bar) were determined from 8 weeks old rats fed standard rodent chow for 2 weeks prior the beginning of the feeding protocol. Data are means  $\pm$  SE of  $n = 13$  to 18 animals per group per time point (Except baseline;  $n = 6$ ). One, two, and three symbols represent  $P < 0.05$ ,  $P < 0.01$ , and  $P < 0.001$ , respectively. <sup>a</sup> vs. baseline, <sup>b</sup> vs. acute term, <sup>c</sup> vs. short term, and <sup>d</sup> vs. intermediate term.

**Supplemental Table 1. Primers and Probes Used for Real-Time PCR Assays**

| Gene<br>Primer/Probe | Sequence                                      |
|----------------------|-----------------------------------------------|
| <i>acc1</i>          |                                               |
| Forward              | 5'-TCGATGTCCTCCCAAACCTTTTT-3'                 |
| Reverse              | 5'-TAGGCGATATAAGCTCTTCGAACA-3'                |
| Probe                | 5'-FAM-AGGTGGTGAGGATGGCGGCTCTG-TAMRA-3'       |
| <i>chrebp</i>        |                                               |
| Forward              | 5'-GAAGACGGCGGAGTACATCCT-3'                   |
| Reverse              | 5'-TGGCAGCATTGAGCTCCTCTAT-3'                  |
| Probe                | 5'-FAM-AGGAAGCGCAGCAACTGAGGGATG-TAMRA-3'      |
| <i>elovl6</i>        |                                               |
| Forward              | 5'-GGTCGGCATCTGATGAACAAG-3'                   |
| Reverse              | 5'-CGAATATACTGAAGACCGCAAGAG-3'                |
| Probe                | 5'-FAM-TGCGGAAGCCGCTCGTGCTC-TAMRA-3'          |
| <i>fasn</i>          |                                               |
| Forward              | 5'-GGAACAACCTCATCCGTTCTCTGT-3'                |
| Reverse              | 5'-GGACCGAGTAATGCCGTTCA-3'                    |
| Probe                | 5'-FAM-CCCATGGCACGGGCACCAAG-TAMRA-3'          |
| <i>scd1</i>          |                                               |
| Forward              | 5'-GCCTGTTAGCCCAGCCTCA-3'                     |
| Reverse              | 5'-CCAGCCAGCCTCTTGTCTACAC-3'                  |
| Probe                | 5'-FAM-CCTTCCCTTAACCCTGAGATCCCCTAGAT-TAMRA-3' |
| <i>scd2</i>          |                                               |
| Forward              | 5'-ACAGCGTGCCTCCTCTCCTA-3'                    |
| Reverse              | 5'-ATACCGATGTGTTGCCATATTTTAGT-3'              |
| Probe                | 5'-FAM-TGATTGGGTGACAGCCGTGGAACCTT-TAMRA-3'    |
| <i>srebp1</i>        |                                               |
| Forward              | 5'-AGCATAGGTGAGGGATCATGGT-3'                  |
| Reverse              | 5'-ACCACGATTGTTTTGGAAGTTTG-3'                 |
| Probe                | 5'-FAM-CCTGGCCCCCTCCCTCTACTCCA-TAMRA-3'       |
| <i>hspa5</i>         |                                               |
| Forward              | 5'-ACCGTCGTATGTGGCCTTCA-3'                    |
| Reverse              | 5'-TCCGGGTTGGACGTGAGTT-3'                     |
| Probe                | 5'-FAM-CTGATTGGCGATGCGGCC-TAMRA-3'            |
| <i>grp94</i>         |                                               |
| Forward              | 5'-TGTCAAAGGTGTTGTGGATTCC-3'                  |
| Reverse              | 5'-AGAGTTTTGCGGACAAGCTTCT-3'                  |
| Probe                | 5'-FAM-TCTCCCCCTCAATGTTTCCCGTGA-TAMRA-3'      |
| <i>pdia4</i>         |                                               |
| Forward              | 5'-CTTCTAACGATGCTAAGCGGTACA-3'                |

Reverse  
Probe

5'-CGCCAAAAGTCTGAGTAGCAGTTCT-3'  
5'-FAM-CAAGCGCCCCCTGGTGGTTGTA-TAMRA-3'

---

All assays are designed for rat sequence. *acc1*, acetyl-CoA carboxylase, cytosolic; *chrebp*, carbohydrate response element binding protein; *elovl6*, ELOVL family member 6, elongation of long chain fatty acids; *fasn*, fatty acid synthase; *hspa5*, heat shock protein 5 ; *pdia4*, protein disulfide isomerase family A, member 4 ; *scd*, stearyl-CoA desaturase; *srebpl*, sterol regulatory element binding protein 1.

# Supplemental Figure 1

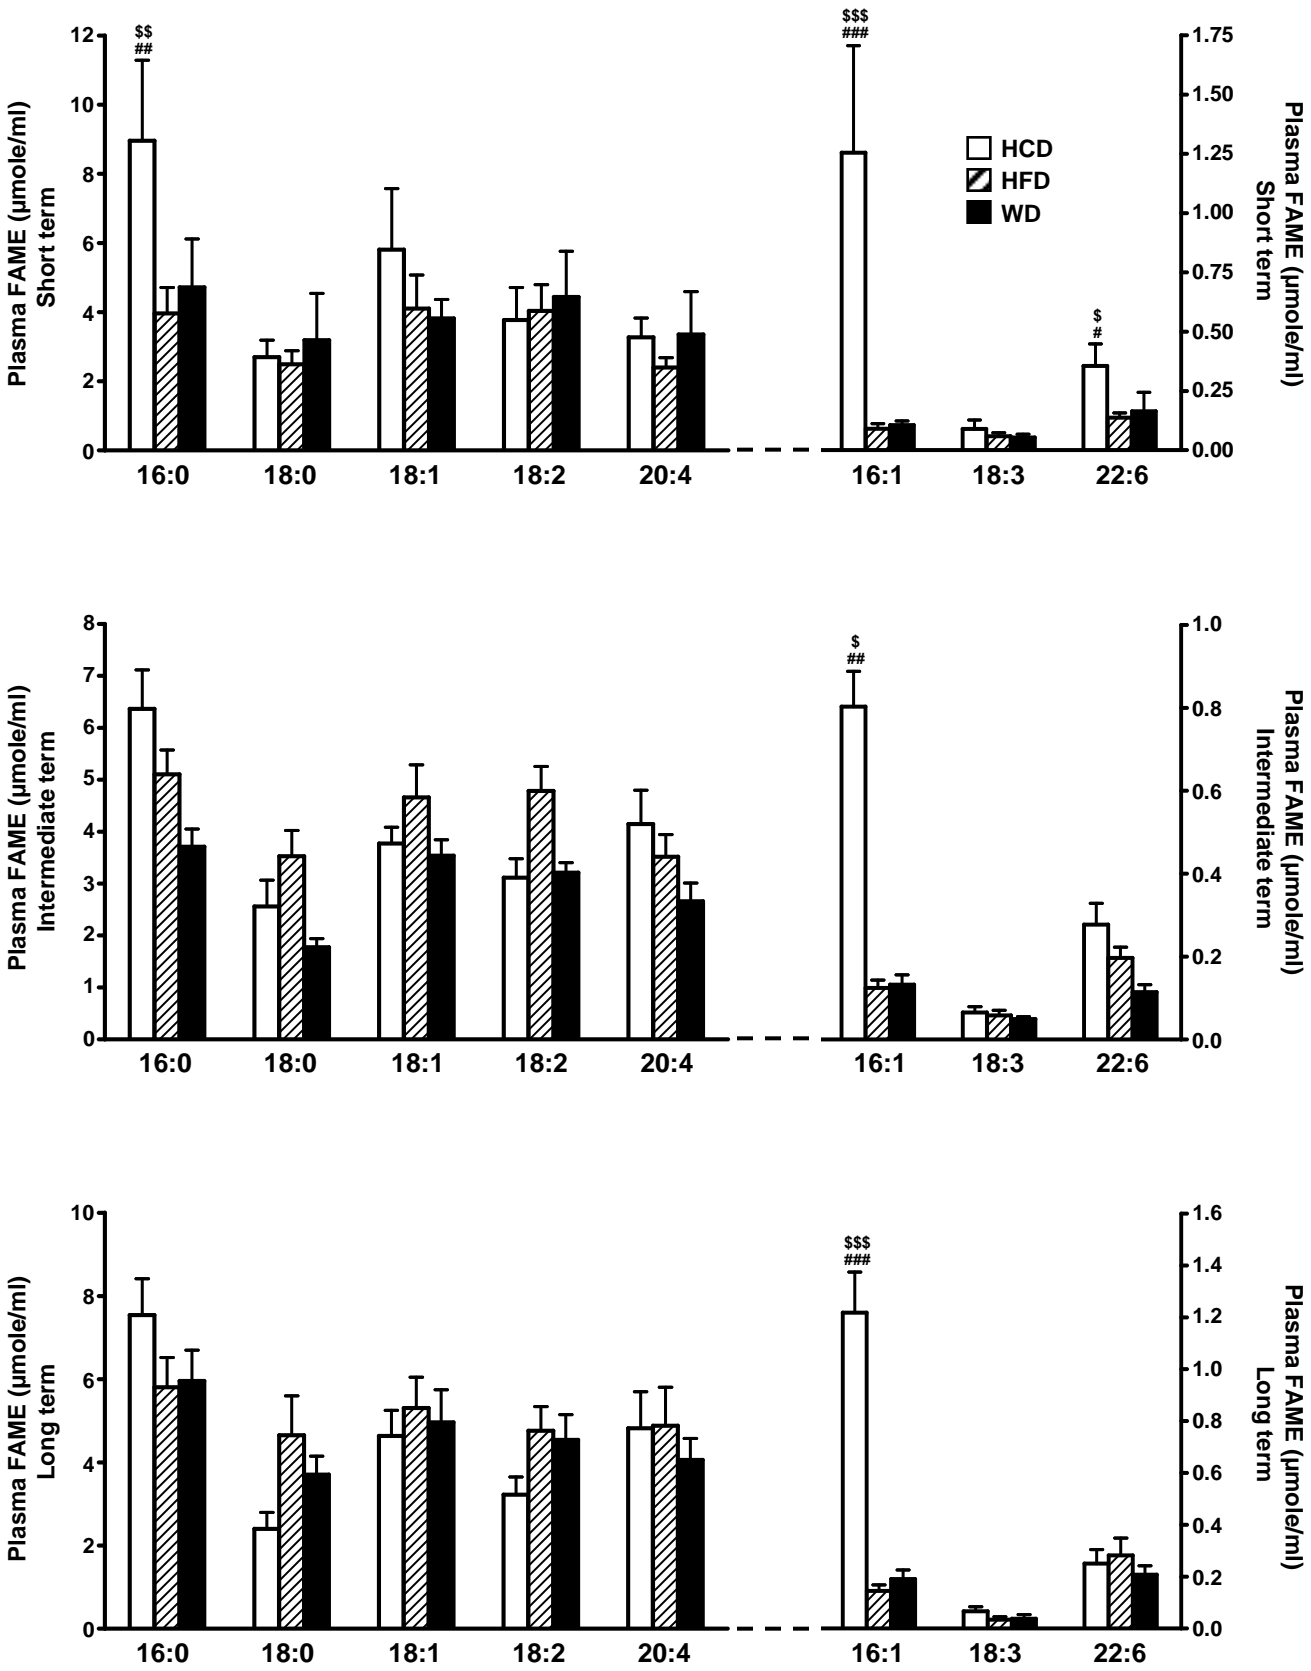

# Supplemental Figure 2

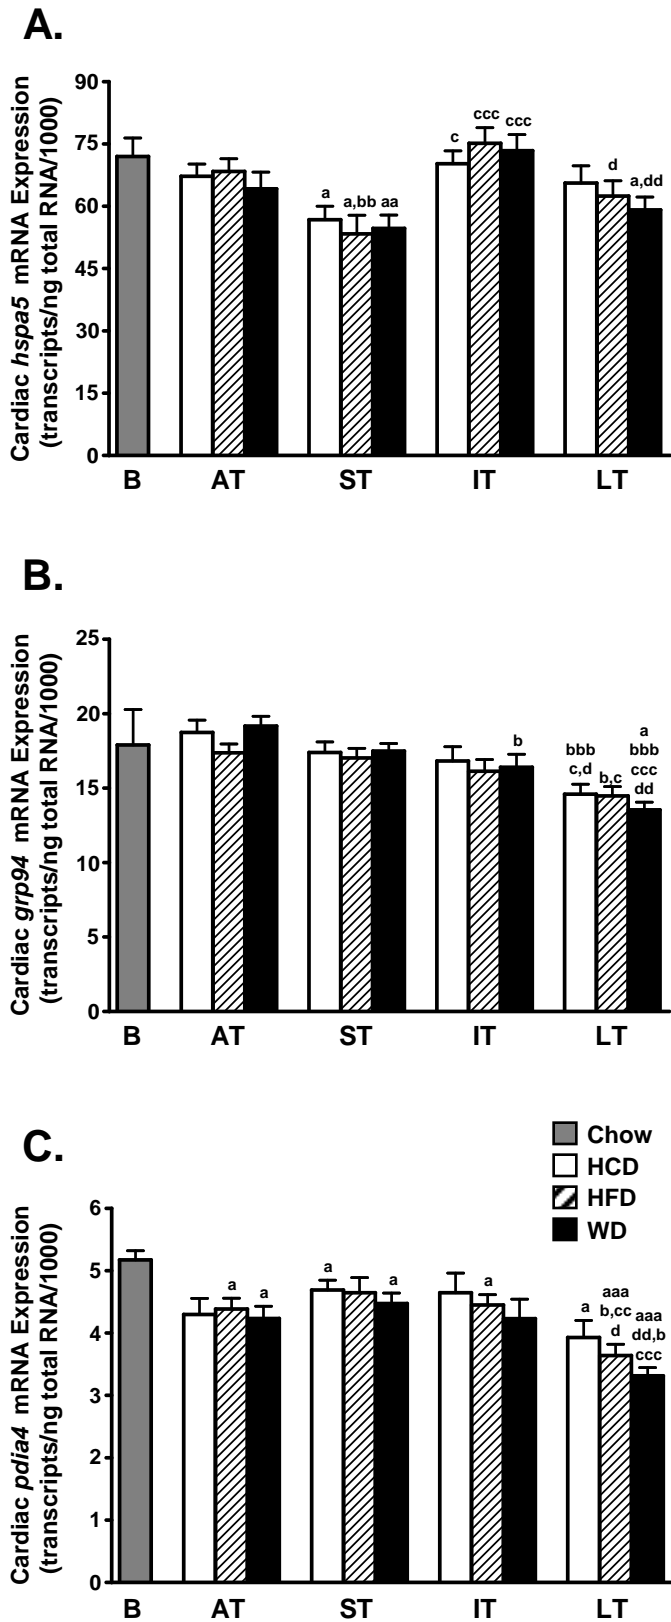

Supplement: supp_M001230_suppdata.pdf [file supp_M001230_suppdata.pdf]
